# Supplementary material
Source: PubMed Central journal article supplement (PMC5845448)
Supplement: NIHMS940974-supplement-Supplement_1.pdf [file NIHMS940974-supplement-Supplement_1.pdf]

# Coverages against different reference sequences

- **All** SMRT cell data was mapped against single reference sequences: pVV8, pVV8 w/ 4 copies of the repeated region, pVV8 with 5 copies of the repeated region, and pVV8 with 7 copies
- 5 copies has 'smoothest' coverage, likely correct

1 repeat

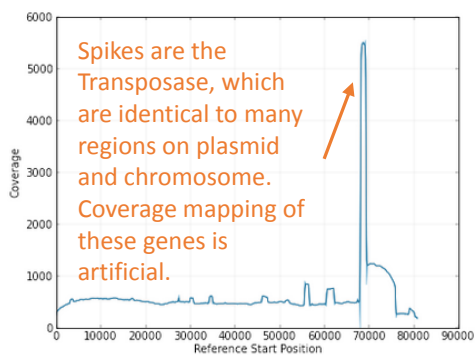

Observed depth of coverage across *Thermus\_thermophilus\_HB8\_plasmid\_pVV8* (window size = 200bp).

4 repeats

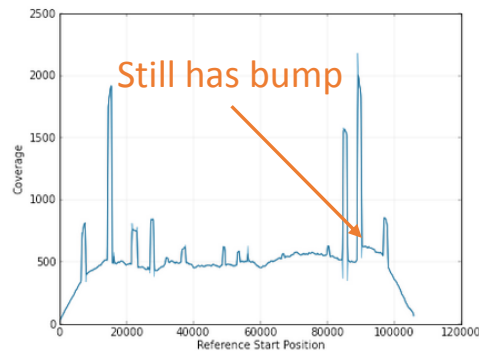

Observed depth of coverage across *scfiquiver\_pVV\_4copy\_NRS* (window size = 200bp).

5 repeats

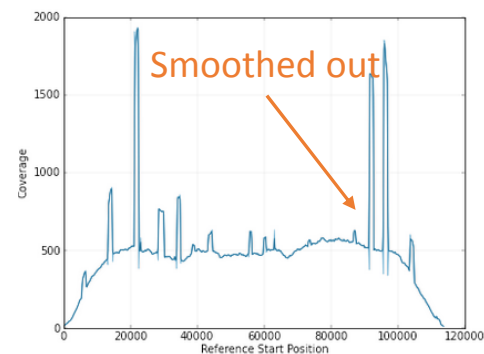

Observed depth of coverage across *Contig21\_trimmed* (window size = 200bp).

7 repeats

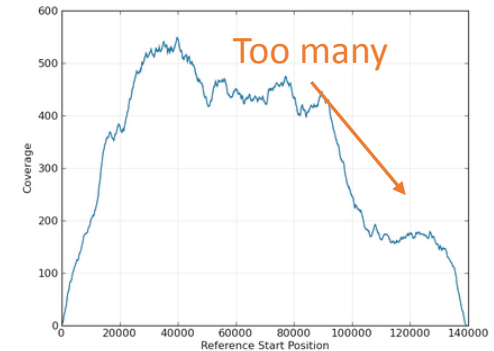

Observed depth of coverage across *unitig\_2* (window size = 200bp).
